# Supplementary material for: Effects of Cardiolipin on the Conformational Dynamics of Membrane-Anchored Bcl-xL
Source: MDPI journal article supplement (doi:10.3390/ijms22179388), 2021-08-30
Supplement: s1 [file s1]

## Supplemental Data

### Effects of Cardiolipin on Conformational Dynamics of Membrane-Anchored Bcl-xL

Vivek Tyagi <sup>1</sup>, Victor Vasquez-Montes <sup>2</sup>, J. Alfredo Freites <sup>3</sup>, Alexander Kyrychenko <sup>2,4</sup>, Douglas J. Tobias <sup>3,\*</sup> and Alexey S. Ladokhin <sup>2,\*</sup>

<sup>1</sup> Department of Materials Science and Engineering, University of California, Irvine, CA 92697, USA

<sup>2</sup> Department of Biochemistry and Molecular Biology, The University of Kansas Medical Center, Kansas City, KS 66160, USA

<sup>3</sup> Department of Chemistry, University of California, Irvine, CA 92697, USA

<sup>4</sup> Institute of Chemistry and School of Chemistry, V. N. Karazin Kharkiv National University, 4 Svobody Square, 61022 Kharkiv, Ukraine

\* Correspondence: D. J. Tobias dtobias@uci.edu; Tel.: +1 949 824 4295

\* Correspondence: A. S. Ladokhin aladokhin@kumc.edu; Tel.: +1 913 588 0489; Fax: +1 913-588-7440

#### Bcl-xL Soluble Head Helical Components

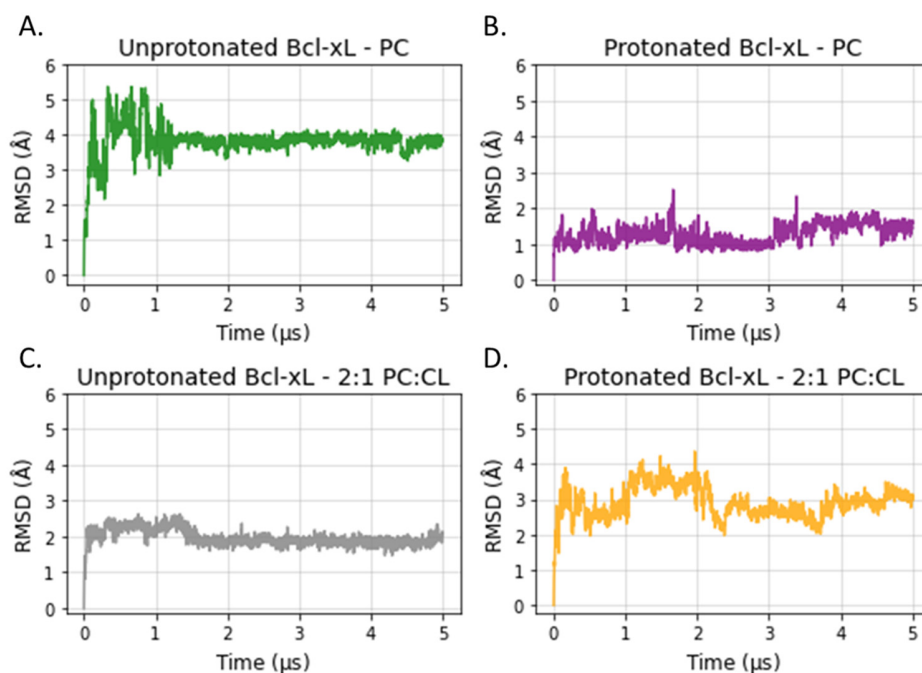

**Supplemental Figure S1.** RMSD of the soluble head (SH) components of Bcl-xL. RMSDs for all four simulated systems are shown as a function of time. RMSDs were calculated from the backbone (C, N) atoms of the helical residues in  $\alpha 1$  through  $\alpha 7$  without including any residues in the disordered regions linking the helices.
